# Supplementary material
Source: Springer Nature journal article supplement (https://www.springermedizin.de/resource/supplementary/12955_2011_890_MOESM1_ESM.pdf/9558646)
Supplement: MOESM1 [file 9558646]

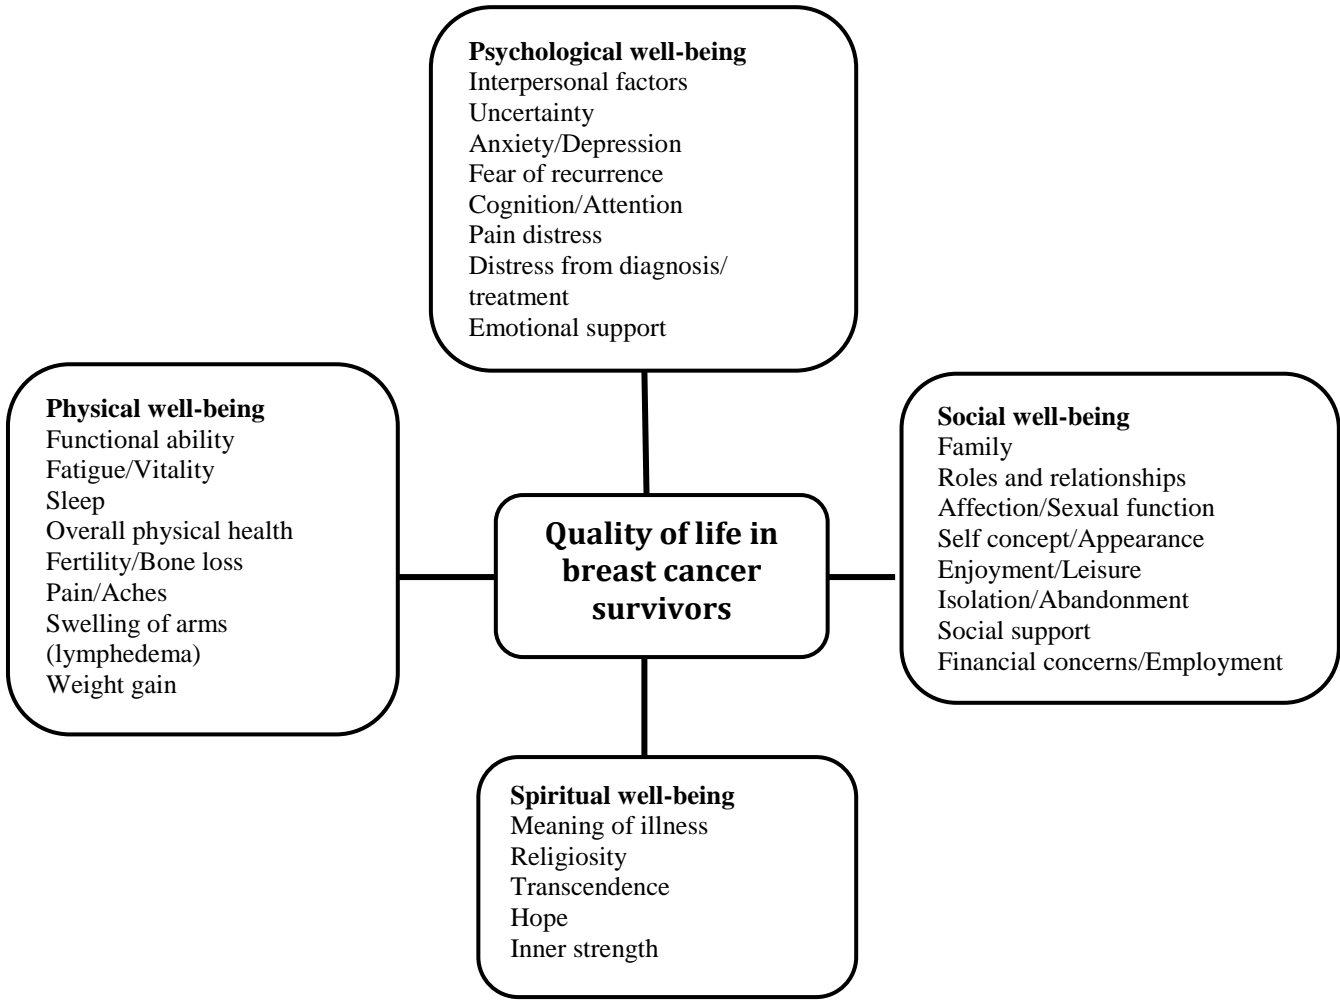

**Psychological well-being**

Interpersonal factors  
Uncertainty  
Anxiety/Depression  
Fear of recurrence  
Cognition/Attention  
Pain distress  
Distress from diagnosis/  
treatment  
Emotional support

**Physical well-being**

Functional ability  
Fatigue/Vitality  
Sleep  
Overall physical health  
Fertility/Bone loss  
Pain/Aches  
Swelling of arms  
(lymphedema)  
Weight gain

**Social well-being**

Family  
Roles and relationships  
Affection/Sexual function  
Self concept/Appearance  
Enjoyment/Leisure  
Isolation/Abandonment  
Social support  
Financial concerns/Employment

**Spiritual well-being**

Meaning of illness  
Religiosity  
Transcendence  
Hope  
Inner strength
